# Supplementary material for: Proteomic Response of Paracoccidioides brasiliensis Exposed to the Antifungal 4-Methoxynaphthalene-N-acylhydrazone Reveals Alteration in Metabolism
Source: MDPI journal article supplement (doi:10.3390/jof9010066), 2022-12-31
Supplement: s1 [file s1]

# Changes in proteomic profile of *Paracoccidioides brasiliensis* induced by 4-methoxynaphthalene-*N*-acetylhydrazine

Lívia do Carmo Silva<sup>1\*</sup>, Kleber Santiago Freitas e Silva<sup>1\*</sup>, Olívia Basso Rocha<sup>\*</sup>, Katheryne Lohany Barros Barbosa<sup>1</sup>, Andrew Matheus Frederico Rozada<sup>2</sup>, Gisele de Freitas Gauze<sup>2</sup>, Célia Maria de Almeida Soares<sup>1</sup>, Maristela Pereira<sup>1\*\*</sup>

<sup>1</sup> Laboratory of Molecular Biology, Institute of Biological Sciences, Federal University of Goiás, Goiânia, Goiás, Brazil.

<sup>2</sup> Department of Chemistry, State University of Maringá, Maringá, Paraná, Brazil

\*Contributed equally to this work

\*\*Correspondent author: Lívia do Carmo Silva – liviacarmo.bio@gmail.com, Maristela Pereira – maristelaufg@gmail.com, Kleber Santiago Freitas e Silva – smallbinho@hotmail.com, Laboratory for Molecular Biology, Federal University of Goiás, Avenida Esperança, s/n, ICB2, Sala 206, Goiânia, GO, 74690-900, Brazil; Telephone: +556235211110.

Table S1. Proteins upregulated by *P. brasiliensis* after exposure to AOS.

| Access Number                                      | Biological process                                                   | Fold change |
|----------------------------------------------------|----------------------------------------------------------------------|-------------|
| <b>METABOLISM</b>                                  |                                                                      |             |
| <b>Metabolism aminoacid</b>                        |                                                                      |             |
| PADG_05085                                         | 1-pyrroline-5-carboxylate dehydrogenase                              | 1.36        |
| PADG_02914                                         | Aminomethyltransferase                                               | 1.46        |
| PADG_06546                                         | Aminopeptidase                                                       | T           |
| PADG_00637                                         | Arginase                                                             | 1.40        |
| PADG_04167                                         | Aspartyl aminopeptidase                                              | T           |
| PADG_04142                                         | Acylpyruvate hydrolase                                               | T           |
| PADG_01418                                         | Cysteine dioxygenase                                                 | T           |
| PADG_01479                                         | Gamma-glutamyltransferase                                            | T           |
| PADG_04516                                         | Glutamate dehydrogenase                                              | T           |
| PADG_05337                                         | Glutamate-5-semialdehyde dehydrogenase                               | T           |
| PADG_00663                                         | Homoserine dehydrogenase                                             | T           |
| PADG_07031                                         | Hydroxymethylglutaryl-CoA lyase                                      | T           |
| PADG_01328                                         | Ornithine aminotransferase                                           | T           |
| PADG_05820                                         | Probable Xaa-Pro aminopeptidase P                                    | T           |
| PADG_01314                                         | Pyridoxal phosphate homeostasis protein                              | T           |
|                                                    | Saccharopine dehydrogenase [NADP <sup>+</sup> , L-glutamate-forming] | T           |
| PADG_01718                                         |                                                                      | T           |
| PADG_08406                                         | O-acetylhomoserine (Thiol)-lyase                                     | 1.32        |
| <b>Lipid, fatty acid and isoprenoid metabolism</b> |                                                                      |             |
| PADG_08018                                         | Glycerol-3-phosphate dehydrogenase                                   | T           |
| PADG_04495                                         | 4-coumarate-CoA ligase                                               | T           |
| PADG_03194                                         | 3-ketoacyl-CoA thiolase B                                            | T           |
| PADG_06382                                         | Acetyl-CoA acetyltransferase                                         | 1.35        |
| PADG_07023                                         | Carnitine O-acetyltransferase                                        | T           |

## **Nitrogen, sulfur and selenium metabolism**

|            |             |   |
|------------|-------------|---|
| PADG_00331 | Uricase     | T |
| PADG_03871 | Urease      | T |
| PADG_06490 | Formamidase | T |

## **Nucleotide Metabolism**

|            |                                                  |      |
|------------|--------------------------------------------------|------|
|            | Ribonucleoside-diphosphate reductase small chain |      |
| PADG_05643 |                                                  | T    |
| PADG_00144 | U6 snRNA-associated Sm-like protein LSm2         | T    |
| PADG_01100 | Uracil phosphoribosyltransferase                 | T    |
| PADG_07530 | Thymidylate kinase                               | T    |
|            | Deoxyuridine 5'-triphosphate nucleotidohydrolase |      |
| PADG_07782 |                                                  | 2.29 |

## **Metabolism of vitamins, cofactors, and prosthetic groups**

|            |                                         |      |
|------------|-----------------------------------------|------|
| PADG_03983 | 6.7-dimethyl-8-ribityllumazine synthase | 1.34 |
| PADG_02513 | Fe-S protein assembly co-chaperone HscB | 2.36 |

## **ENERGY**

### **Glycolysis and gluconeogenesis**

|            |                                         |      |
|------------|-----------------------------------------|------|
| PADG_03813 | Hexokinase                              | T    |
| PADG_00192 | 6-phosphofructokinase                   | T    |
| PADG_01278 | Pyruvate kinase                         | 1.49 |
| PADG_02063 | Pyruvate dehydrogenase                  | 1.46 |
| PADG_08503 | Phosphoenolpyruvate carboxykinase [ATP] | T    |

### **Tricarboxylic-acid pathway**

|            |                                         |      |
|------------|-----------------------------------------|------|
| PADG_04710 | Citrate synthase                        | 1.31 |
| PADG_04249 | Isocitrate dehydrogenase [NADP]         | 1.60 |
| PADG_01762 | Oxoglutarate dehydrogenase E1 component | T    |

### **Electron transport and membrane-associated energy conservation**

|            |                                          |   |
|------------|------------------------------------------|---|
| PADG_03872 | NADH-cytochrome b5 reductase             | T |
| PADG_11981 | V-type proton ATPase catalytic subunit A | T |

### **Fermentation**

|            |                         |   |
|------------|-------------------------|---|
| PADG_00171 | L-lactate dehydrogenase | T |
| PADG_11405 | Alcohol dehydrogenase 1 | T |

### **Pentose phosphate pathway**

|            |                           |      |
|------------|---------------------------|------|
| PADG_07771 | 6-phosphogluconolactonase | T    |
| PADG_07420 | Transaldolase             | 1.31 |

### **Glyoxylate cycle**

|            |                 |   |
|------------|-----------------|---|
| PADG_04702 | Malate synthase | T |
|------------|-----------------|---|

## **BIOGENESIS OF CELLULAR COMPONENTS**

|            |                                      |      |
|------------|--------------------------------------|------|
| PADG_00604 | Phosphoacetylglucosamine mutase      | T    |
| PADG_04148 | Alpha-mannosidase                    | T    |
| PADG_04761 | Mannosyl-oligosaccharide glucosidase | T    |
| PADG_07249 | Coronin                              | 1.45 |

## **CELL RESCUE, DEFENSE AND VIRULENCE**

|            |                              |   |
|------------|------------------------------|---|
|            | S-(hydroxymethyl)glutathione |   |
| PADG_03276 | dehydrogenase                | T |

|            |                                |      |
|------------|--------------------------------|------|
| PADG_01551 | Thioredoxin reductase          | 1.31 |
| PADG_01954 | Superoxide dismutase           | T    |
| PADG_03423 | Glutathione S-transferase Gst3 | T    |
| PADG_03562 | Chaperone DnaK                 | 1.35 |
| PADG_07460 | Vacuolar aminopeptidase        | T    |

#### CELL CYCLE

|            |                                    |      |
|------------|------------------------------------|------|
| PADG_11679 | Proliferating cell nuclear antigen | 1.38 |
| PADG_02300 | Phosphatase 2C Ptc3                | T    |
| PADG_00656 | Non-histone chromosomal protein 6  | 5.26 |

#### TRANSCRIPTION

|            |                                               |   |
|------------|-----------------------------------------------|---|
| PADG_06856 | Small nuclear ribonucleoprotein Sm D2         | T |
| PADG_05900 | Transcription elongation factor 1 homolog     | T |
| PADG_03406 | Transcription initiation factor IIA subunit 2 | T |

#### PROTEIN SYNTHESIS

|            |                                            |      |
|------------|--------------------------------------------|------|
| PADG_00878 | Isoleucine-tRNA ligase                     | T    |
| PADG_08472 | Lysine--tRNA ligase                        | T    |
| PADG_02484 | Valine-tRNA ligase                         | T    |
| PADG_03326 | 40S ribosomal protein S9                   | T    |
| PADG_04315 | 40S ribosomal protein S24                  | 2.05 |
| PADG_07583 | 40S ribosomal protein S21                  | T    |
| PADG_01914 | 60S ribosomal protein L35                  | T    |
| PADG_04065 | 60S ribosomal protein L36                  | T    |
| PADG_07803 | 60S ribosomal protein L12                  | T    |
| PADG_02056 | Ribosomal protein L7/L12                   | 1.80 |
| PADG_03856 | Ribosomal protein L15                      | 1.43 |
| PADG_04075 | rRNA processing protein RRP9               | 1.70 |
|            | Eukaryotic translation initiation factor 3 |      |
| PADG_01160 | subunit M                                  | T    |
| PADG_06110 | Translation initiation factor SUI1         | 1.40 |
| PADG_05404 | Deoxyhypusine hydroxylase                  | T    |
| PADG_01565 | Calnexin                                   | T    |

#### PROTEIN FATE

|            |                                         |      |
|------------|-----------------------------------------|------|
| PADG_03967 | Proteasome component C                  | T    |
| PADG_03982 | Proteasome endopeptidase complex        | T    |
| PADG_06290 | Proteasome subunit alpha type           | T    |
| PADG_08095 | 26S proteasome regulatory subunit rpn-8 | 6.36 |
| PADG_02637 | Biquitin-conjugating enzyme             | T    |
| PADG_07953 | Peptidyl-prolyl cis-trans isomerase     | T    |

#### PROTEIN WITH BINDING FUNCTION OR COFACTOR REQUIREMENT

|            |                             |   |
|------------|-----------------------------|---|
| PADG_01032 | DNA-binding protein, 42 kDa | T |
|------------|-----------------------------|---|

#### UNCLASSIFIED PROTEIN

|            |                      |   |
|------------|----------------------|---|
| PADG_11833 | Hypothetical protein | T |
| PADG_06593 | Hypothetical protein | T |
| PADG_11352 | Hypothetical protein | T |

|            |                      |      |
|------------|----------------------|------|
| PADG_11111 | Hypothetical protein | T    |
| PADG_11424 | Hypothetical protein | T    |
| PADG_00828 | Hypothetical protein | T    |
| PADG_00951 | Hypothetical protein | T    |
| PADG_00060 | Hypothetical protein | 1.60 |
| PADG_00092 | Hypothetical protein | T    |
| PADG_00688 | Hypothetical protein | T    |
| PADG_00694 | Hypothetical protein | 2.92 |
| PADG_02181 | Hypothetical protein | T    |
| PADG_02338 | Hypothetical protein | 1.51 |
| PADG_01363 | Hypothetical protein | T    |
| PADG_01473 | Hypothetical protein | 1.48 |
| PADG_01503 | Hypothetical protein | T    |
| PADG_08402 | Hypothetical protein | T    |
| PADG_02847 | Hypothetical protein | T    |
| PADG_02981 | Hypothetical protein | T    |
| PADG_03095 | Hypothetical protein | 3.25 |
| PADG_03104 | Hypothetical protein | 1.32 |
| PADG_03176 | Hypothetical protein | T    |
| PADG_03526 | Hypothetical protein | 1.72 |
| PADG_04165 | Hypothetical protein | T    |
| PADG_04193 | Hypothetical protein | T    |
| PADG_04907 | Hypothetical protein | T    |
| PADG_04994 | Hypothetical protein | T    |
| PADG_05167 | Hypothetical protein | T    |
| PADG_06136 | Hypothetical protein | 4.35 |
| PADG_02764 | Hypothetical protein | T    |
| PADG_06196 | Hypothetical protein | T    |
| PADG_06997 | Hypothetical protein | T    |
| PADG_07506 | Hypothetical protein | 1.80 |
| PADG_07515 | Hypothetical protein | 1.51 |
| PADG_07670 | Hypothetical protein | T    |
| PADG_07682 | Hypothetical protein | T    |
| PADG_07870 | Hypothetical protein | T    |
| PADG_07896 | Hypothetical protein | T    |
| PADG_03149 | Hypothetical protein | T    |

\* T: Proteins identified only in the treatment condition (cells cultured in the presence of AOS).

Table S2. Proteins downregulated by *P. brasiliensis* after exposure to AOS

| Access Number               | Biological process | Fold Change |
|-----------------------------|--------------------|-------------|
| <b>METABOLISM</b>           |                    |             |
| <b>Metabolism aminoacid</b> |                    |             |

|            |                                                                        |      |
|------------|------------------------------------------------------------------------|------|
| PADG_00685 | 3-hydroxy-3-methylglutaryl coenzyme A synthase                         | C    |
| PADG_03167 | 3-isopropylmalate dehydratase                                          | C    |
| PADG_08468 | 4-hydroxyphenylpyruvate dioxygenase                                    | 0.50 |
| PADG_08328 | 5-methyltetrahydropteroyltriglutamate-homocysteine S-methyltransferase | 0.72 |
| PADG_00888 | Argininosuccinate synthase                                             | 0.59 |
| PADG_08262 | Asparagine synthase                                                    | C    |
| PADG_04570 | Branched-chain-amino-acid aminotransferase 3                           | 0.68 |
| PADG_03984 | Glutamine-fructose-6-phosphate transaminase                            | 0.25 |
| PADG_03825 | NAD-specific glutamate dehydrogenase                                   | 0.56 |
| PADG_01615 | Homocitrate synthase. mitochondrial                                    | C    |
| PADG_07366 | Methylcrotonoyl-CoA carboxylase subunit alpha                          | C    |
| PADG_06144 | Saccharopine dehydrogenase                                             | 0.58 |
| PADG_01928 | S-adenosylmethionine synthase                                          | 0.59 |
| PADG_03522 | S-methyl-5'-thioadenosine phosphorylase                                | C    |
| PADG_05301 | Cystathionine beta-synthase                                            | 0.61 |

#### **Lipid, fatty acid and isoprenoid metabolism**

|            |                                               |      |
|------------|-----------------------------------------------|------|
| PADG_08651 | Peroxisomal hydratase-dehydrogenase-epimerase | C    |
| PADG_00254 | Fatty acid synthase subunit alpha             | C    |
| PADG_00255 | FAD dependent oxidoreductase superfamily      | 0.67 |
| PADG_05783 | Farnesyl pyrophosphate synthetase             | 0.64 |
| PADG_00608 | Formyl-coenzyme A transferase                 | 0.75 |

#### **C-compound and carbohydrate metabolism**

|            |                                                      |      |
|------------|------------------------------------------------------|------|
| PADG_04900 | Trehalose-6-phosphate synthase                       | C    |
| PADG_08474 | Mannose-1-phosphate guanyltransferase subunit beta-A | 0.18 |
| PADG_01993 | Acetoacetate-CoA ligase                              | C    |

#### **Nitrogen, sulfur and selenium metabolism**

|            |                                                  |      |
|------------|--------------------------------------------------|------|
| PADG_07674 | Carbonic anhydrase                               | C    |
| PADG_07010 | Urease accessory protein UreG                    | 0.51 |
| PADG_00446 | Oxidoreductase 2-nitropropane dioxygenase family | C    |

#### **Metabolism of vitamins, cofactors, and prosthetic groups**

|            |                          |      |
|------------|--------------------------|------|
| PADG_00443 | Dihydropteroate synthase | 0.63 |
|------------|--------------------------|------|

#### **Nucleotide/nucleoside/nucleobase metabolism**

|            |                        |      |
|------------|------------------------|------|
| PADG_05321 | Mitochondrial nuclease | 0.02 |
|------------|------------------------|------|

#### **Secondary metabolism**

|            |                                       |   |
|------------|---------------------------------------|---|
| PADG_04603 | Spermidine synthase                   | C |
| PADG_08034 | Dienelactone hydrolase family protein | C |

#### **ENERGY**

**Tricarboxylic-acid pathway**

|            |                                        |      |
|------------|----------------------------------------|------|
| PADG_02805 | Isocitrate dehydrogenase mitochondrial | 0.59 |
| PADG_04993 | Citrate synthase subunit 1             | 0.64 |
| PADG_11845 | Aconitate hydratase mitochondrial      | 0.45 |
|            | Succinate-CoA ligase subunit alpha     |      |
| PADG_02260 | mitochondrial                          | C    |

**Electron transport and membrane-associated energy conservation**

|            |                                         |      |
|------------|-----------------------------------------|------|
| PADG_08391 | Plasma membrane ATPase                  | C    |
| PADG_04729 | ATP synthase subunit d mitochondrial    | C    |
| PADG_05402 | ATP synthase Mitochondrial F1F0         | C    |
|            | Cytochrome b-c1 complex subunit Rieske. |      |
| PADG_05436 | mitochondrial                           | C    |
|            | Cytochrome c oxidase subunit 4.         |      |
| PADG_04397 | mitochondrial                           | 0.76 |

**Glycolysis and gluconeogenesis**

|            |                                    |      |
|------------|------------------------------------|------|
| PADG_03118 | Glucose-6-phosphate 1-epimerase    | 0.73 |
| PADG_01896 | Phosphoglycerate kinase            | 0.54 |
| PADG_00780 | Ribose-phosphate pyrophosphokinase | 0.61 |

**CELL RESCUE. DEFENSE AND VIRULENCE**

|            |                                    |      |
|------------|------------------------------------|------|
| PADG_00324 | Catalase                           | C    |
| PADG_01711 | Hsp90 co-chaperone AHA1            | 0.42 |
| PADG_07715 | Hsp90-like protein                 | 0.30 |
| PADG_00765 | Hsp98-like protein                 | C    |
| PADG_03963 | 30 kDa heat shock protein          | 0.63 |
| PADG_04034 | Chaperone DnaJ                     | 0.45 |
| PADG_05628 | Protein disulfide-isomerase domain | 0.49 |
| PADG_05122 | Prenylcysteine oxidase             | C    |

**BIOGENESIS OF CELLULAR COMPONENTS**

|            |                            |      |
|------------|----------------------------|------|
| PADG_00128 | Tubulin alpha chain        | 0.39 |
| PADG_08413 | Tubulin alpha chain        | C    |
| PADG_12077 | Actin                      | 0.46 |
| PADG_12076 | Actin                      | 0.51 |
| PADG_05538 | Actin                      | 0.70 |
| PADG_00344 | Actin cytoskeleton protein | 0.71 |

**CELL CYCLE AND DNA PROCESSING**

|            |                                  |      |
|------------|----------------------------------|------|
| PADG_00849 | Nuclear segregation protein Bfr1 | 0.76 |
|------------|----------------------------------|------|

**CELL FATE**

|            |                              |      |
|------------|------------------------------|------|
| PADG_06763 | Septum formation protein Maf | 0.38 |
| PADG_06336 | Cell lysis protein cw11      | 0.52 |
| PADG_07726 | Periodic tryptophan protein  | C    |

**CELLULAR COMMUNICATION/SIGNAL TRANSDUCTION MECHANISM**

|            |                          |   |
|------------|--------------------------|---|
| PADG_02017 | Calmodulin               | C |
| PADG_08342 | GTP-binding protein ypt1 | C |
| PADG_08337 | GTP-binding protein rhoA | C |

|            |                             |      |
|------------|-----------------------------|------|
| PADG_00554 | GTP-binding protein rho2    | C    |
| PADG_04810 | GTP-binding nuclear protein | 0.53 |
| PADG_05608 | GTP-binding protein ypt7    | 0.68 |

#### **CELLULAR TRANSPORT, TRANSPORT FACILITIES AND TRANSPORT ROUTES**

|            |                                  |      |
|------------|----------------------------------|------|
| PADG_01440 | ADP.ATP carrier protein          | C    |
| PADG_00622 | ATPase GET3                      | 0.30 |
| PADG_04100 | Clathrin heavy chain             | C    |
| PADG_02022 | Clathrin light chain             | C    |
| PADG_02134 | Coatomer subunit epsilon         | C    |
| PADG_07508 | Phosphatidylinositol transporter | 0.64 |
| PADG_01243 | Rab GDP dissociation inhibitor   | C    |
| PADG_01567 | Sorting nexin 3                  | C    |
| PADG_05898 | Rheb small monomeric GTPase RhbA | 0.31 |

#### **PROTEIN SYNTHESIS**

|            |                                 |      |
|------------|---------------------------------|------|
| PADG_06525 | 40S ribosomal protein S1        | 0.66 |
| PADG_00335 | 40S ribosomal protein S14       | 0.70 |
| PADG_02445 | 40S ribosomal protein S15       | 0.70 |
| PADG_12324 | 40S ribosomal protein S19       | 0.70 |
| PADG_06680 | 40S ribosomal protein S22       | 0.55 |
| PADG_06048 | 40S ribosomal protein S27       | 0.73 |
| PADG_08605 | 40S ribosomal protein S28       | 0.42 |
| PADG_04030 | 60S acidic ribosomal protein P0 | 0.45 |
| PADG_08244 | 60S acidic ribosomal protein P1 | 0.51 |
| PADG_02446 | 60S acidic ribosomal protein P2 | 0.63 |
| PADG_02249 | 60S ribosomal protein L2        | 0.68 |
| PADG_12253 | 60S ribosomal protein L3        | 0.09 |
| PADG_11379 | 60S ribosomal protein L5        | 0.74 |
| PADG_04848 | 60S ribosomal protein L8-B      | C    |
| PADG_03778 | 60S ribosomal protein L10-A     | 0.73 |
| PADG_11227 | 60S ribosomal protein L13       | 0.76 |
| PADG_05338 | 60S ribosomal protein L18-B     | 0.76 |
| PADG_03873 | 60S ribosomal protein L20       | C    |
| PADG_04588 | Ribosomal protein L22           | 0.53 |
| PADG_04449 | 60S ribosomal protein L23       | 0.73 |
| PADG_05883 | 60S ribosomal protein L25       | 0.73 |
| PADG_05939 | 60S ribosomal protein L27a      | 0.64 |
| PADG_01083 | 60S ribosomal protein L32       | 0.75 |
| PADG_02828 | Ribosomal protein               | C    |
| PADG_05721 | Ribosomal protein L4            | 0.65 |
| PADG_00785 | Ribosomal protein S15           | C    |
| PADG_05388 | Asparagine-tRNA ligase          | C    |
| PADG_04962 | Aspartate-tRNA(Asn) ligase      | 0.61 |
| PADG_00002 | Alanine-tRNA ligase             | 0.70 |
| PADG_03689 | Tyrosine-tRNA ligase            | C    |



|            |                                               |      |
|------------|-----------------------------------------------|------|
| PADG_05848 | Glycine-tRNA ligase                           | C    |
| PADG_00821 | Glutamate-tRNA ligase                         | C    |
| PADG_03440 | Proline-tRNA ligase                           | 0.05 |
| PADG_01558 | Histidyl-tRNA synthetase                      | 0.68 |
| PADG_01406 | Phenylalanine-tRNA ligase. beta subunit       | 0.64 |
| PADG_00692 | Elongation factor 1-alpha                     | 0.64 |
| PADG_08125 | Elongation factor 2                           | 0.61 |
| PADG_07229 | Elongation factor 3 partial mRNA              | C    |
| PADG_01949 | Elongation factor Tu                          | 0.55 |
|            | Eukaryotic translation initiation factor 1A.  |      |
| PADG_07977 | Y-chromosomal                                 | C    |
|            | Eukaryotic translation initiation factor 2    |      |
| PADG_04083 | subunit gamma                                 | C    |
|            | Eukaryotic translation initiation factor 3    |      |
| PADG_04016 | subunit A                                     | C    |
|            | Eukaryotic translation initiation factor 3    |      |
| PADG_02296 | subunit F                                     | C    |
|            | Eukaryotic translation initiation factor 3    |      |
| PADG_04251 | subunit I                                     | C    |
|            | Eukaryotic translation initiation factor 3    |      |
| PADG_04057 | subunit J                                     | 0.57 |
|            | Eukaryotic translation initiation factor 3    |      |
| PADG_00342 | subunit L                                     | C    |
| PADG_00932 | Eukaryotic translation initiation factor eIF3 | C    |
| PADG_07888 | Eukaryotic translation initiation factor 5A   | C    |
| PADG_04210 | Translation initiation factor 2 subunit beta  | 0.65 |
| PADG_11711 | ATP-dependent RNA helicase eIF4A              | 0.30 |
| PADG_05787 | ATP-dependent RNA helicase FAL1               | C    |
| PADG_04672 | ATP-dependent RNA helicase SUB2               | C    |

## PROTEIN FATE

|            |                                      |      |
|------------|--------------------------------------|------|
|            | 26S proteasome non-ATPase regulatory |      |
| PADG_04234 | subunit 8                            | C    |
| PADG_00599 | 26S protease regulatory subunit 6A   | C    |
|            | 26S proteasome non-ATPase regulatory |      |
| PADG_06851 | subunit 11                           | 0.23 |
|            | 26S proteasome non-ATPase regulatory |      |
| PADG_12469 | subunit 6                            | C    |
| PADG_03680 | Proteasome subunit beta type         | C    |
| PADG_02833 | ADP-ribosylation factor              | C    |
| PADG_08048 | T-complex protein 1 subunit beta     | C    |
| PADG_00050 | T-complex protein 1 subunit delta    | 0.45 |
| PADG_08484 | T-complex protein 1 subunit epsilon  | C    |
| PADG_00602 | Arginine N-methyltransferase         | 0.68 |
| PADG_06359 | Bleomycin hydrolase                  | C    |



|                             |                                         |      |
|-----------------------------|-----------------------------------------|------|
|                             | E3 ubiquitin ligase complex SCF subunit |      |
| PADG_05837                  | sconC                                   | 0.07 |
| PADG_04092                  | Peptidyl-prolyl cis-trans isomerase     | C    |
| <b>UNCLASSIFIED PROTEIN</b> |                                         |      |
| PADG_03147                  | Hypothetical protein                    | C    |
| PADG_12408                  | Hypothetical protein                    | C    |
| PADG_11705                  | Hypothetical protein                    | C    |
| PADG_11793                  | Hypothetical protein                    | C    |
| PADG_11832                  | Hypothetical protein                    | 0.70 |
| PADG_11128                  | Hypothetical protein                    | C    |
| PADG_11413                  | Hypothetical protein                    | 0.64 |
| PADG_00855                  | Hypothetical protein                    | C    |
| PADG_00222                  | Hypothetical protein                    | C    |
| PADG_00449                  | Hypothetical protein                    | C    |
| PADG_00528                  | Hypothetical protein                    | C    |
| PADG_00541                  | Hypothetical protein                    | C    |
| PADG_02092                  | Hypothetical protein                    | C    |
| PADG_02206                  | Hypothetical protein                    | 0.54 |
| PADG_02352                  | Hypothetical protein                    | C    |
| PADG_01488                  | Hypothetical protein                    | 0.47 |
| PADG_01702                  | Hypothetical protein                    | C    |
| PADG_01935                  | Hypothetical protein                    | C    |
| PADG_02048                  | Hypothetical protein                    | C    |
| PADG_03431                  | Hypothetical protein                    | 0.66 |
| PADG_02456                  | Hypothetical protein                    | C    |
| PADG_02854                  | Hypothetical protein                    | C    |
| PADG_02878                  | Hypothetical protein                    | C    |
| PADG_02967                  | Hypothetical protein                    | 0.59 |
| PADG_03115                  | Hypothetical protein                    | C    |
| PADG_03170                  | Hypothetical protein                    | C    |
| PADG_03210                  | Hypothetical protein                    | 0.69 |
| PADG_03219                  | Hypothetical protein                    | C    |
| PADG_03244                  | Hypothetical protein                    | C    |
| PADG_03325                  | Hypothetical protein                    | 0.75 |
| PADG_03609                  | Hypothetical protein                    | C    |
| PADG_03703                  | Hypothetical protein                    | C    |
| PADG_03999                  | Hypothetical protein                    | C    |
| PADG_04307                  | Hypothetical protein                    | C    |
| PADG_04311                  | Hypothetical protein                    | 0.63 |
| PADG_06033                  | Hypothetical protein                    | 0.70 |
| PADG_04869                  | Hypothetical protein                    | C    |
| PADG_05034                  | Hypothetical protein                    | 0.44 |
| PADG_04657                  | Hypothetical protein                    | 0.73 |
| PADG_04730                  | Hypothetical protein                    | C    |
| PADG_05227                  | Hypothetical protein                    | C    |

|            |                      |      |
|------------|----------------------|------|
| PADG_05341 | Hypothetical protein | C    |
| PADG_05598 | Hypothetical protein | 0.63 |
| PADG_05750 | Hypothetical protein | 0.76 |
| PADG_05893 | Hypothetical protein | 0.74 |
| PADG_06117 | Hypothetical protein | C    |
| PADG_06305 | Hypothetical protein | C    |
| PADG_06888 | Hypothetical protein | 0.36 |
| PADG_06969 | Hypothetical protein | C    |
| PADG_07714 | Hypothetical protein | 0.64 |
| PADG_08715 | Hypothetical protein | 0.74 |
| PADG_07264 | Hypothetical protein | C    |
| PADG_00824 | Hypothetical protein | 0.68 |

---

\* C: Proteins identified only in the control condition (cells cultured in the absence of AOS).
